# Supplementary material for: Tannic acid–poloxamer self-assembled nanoparticles for advanced atherosclerosis therapy by regulation of macrophage polarization
Source: Royal Society of Chemistry journal article supplement (doi:10.1039/d3tb01157g), 2024-01-01
Supplement: d3tb01157g1.pdf [file d3tb01157g1.pdf]

**Tannic acid–Poloxamer Self-Assembled Nanoparticles for Advanced Atherosclerosis  
Therapy by Regulation of Macrophage Polarization**

Haoguang Wu<sup>a,b,1</sup>, Jie Sheng<sup>a,1</sup>, Zhiyue Wang<sup>a,1</sup>, Ziyue Zu<sup>a,1</sup>, Kaiyan Xiang<sup>a</sup>, Jianchen Qi<sup>a</sup>,  
Zhicheng Wang<sup>c</sup>, Guangming Lu<sup>a</sup>, Longjiang Zhang<sup>\*a</sup>

*<sup>a</sup>Department of Radiology, Affiliated Hospital of Medical School, Nanjing University,  
Nanjing, 210002 Jiangsu, China*

*<sup>b</sup>Department of Radiology, Shunde Hospital, Southern Medical University (The First People's  
Hospital of Shunde), No. 1 Jiazi Road, Lunjiao, Shunde District, Foshan City, 528308,  
Guangdong Province, China.*

*<sup>c</sup>Department of Cardiology, Affiliated Sir Run Run Hospital of Nanjing Medical University,  
Nanjing, 211166 Jiangsu, China*

**Supporting Information**

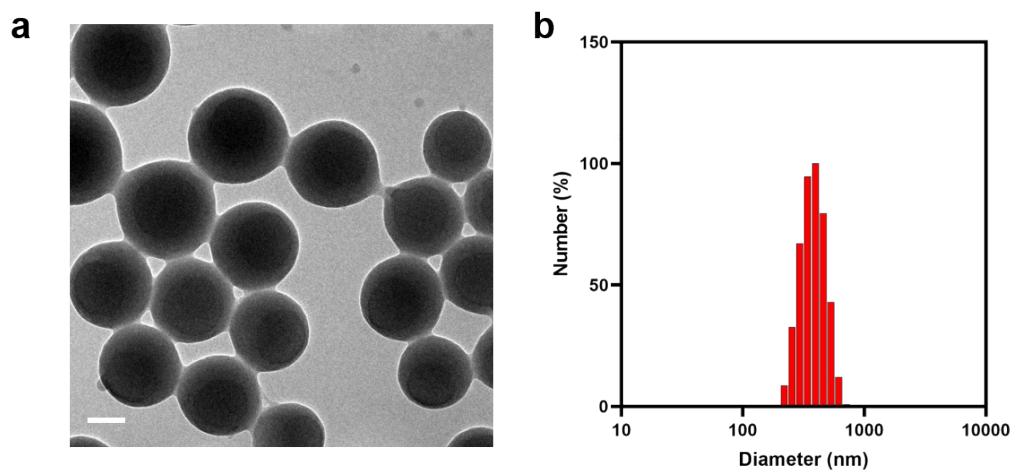

**Fig. S1** TEM images (a) and hydrodynamic size (b) distribution graphs of TPNP@IR820. Scale bar: 200 nm.

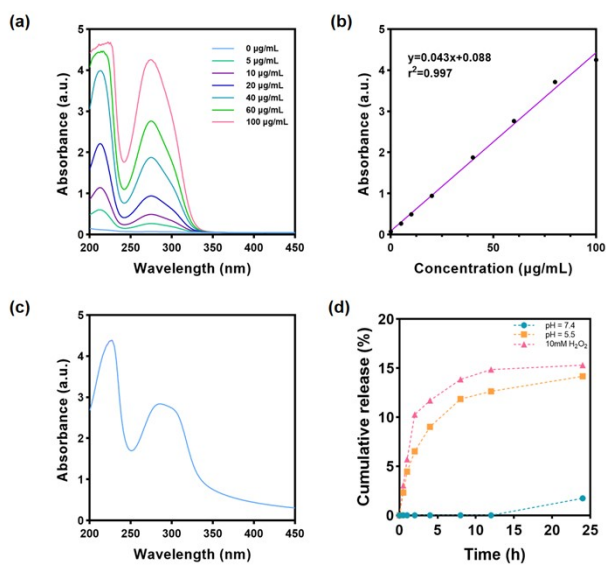

**Fig. S2** (a) UV-VIS spectra of different concentration of TA in DI water. (b) The linear regression curve of TA in DI water. (c) The UV-VIS spectrum of TPNP (100 µg/mL) in DI water. (d) In vitro TA release profiles from TPNP in different buffer during 24 hours.

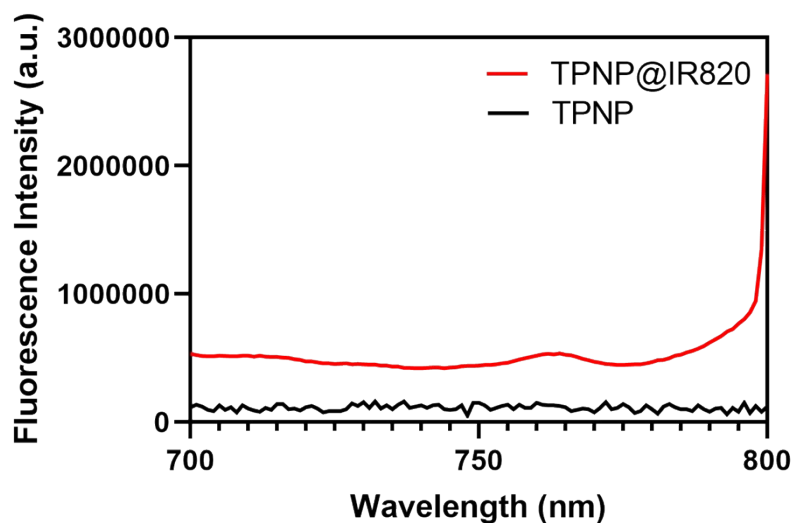

**Fig. S3** The fluorescence spectrum of the TPNP@IR820 and TPNP

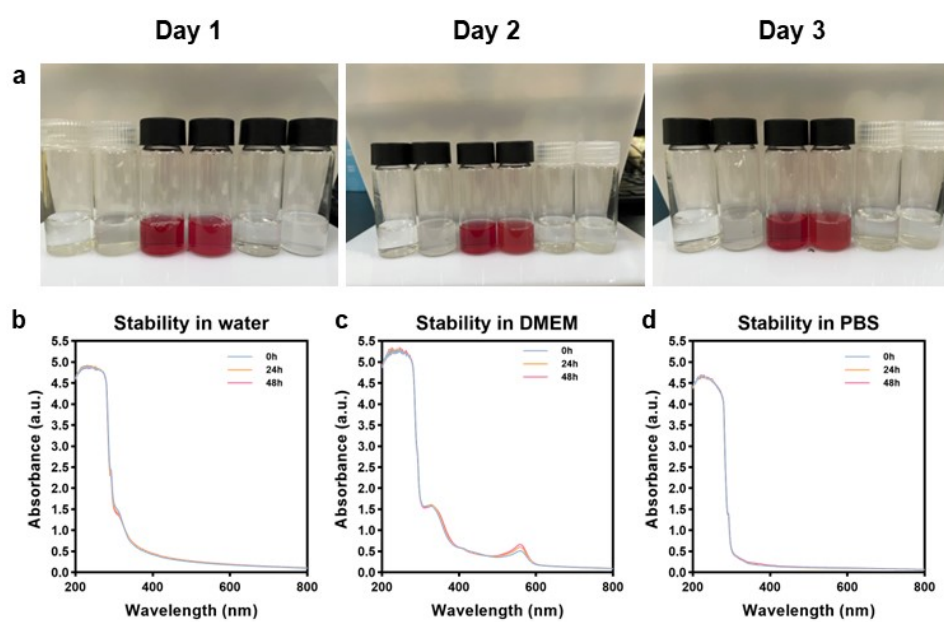

**Fig. S4** (a) Photos of TPNP in water, DMEM culture medium and PBS during Day1 to Day3. (b) UV-VIS spectra of TPNP in water, DMEM culture medium and PBS during Day1 to Day3.

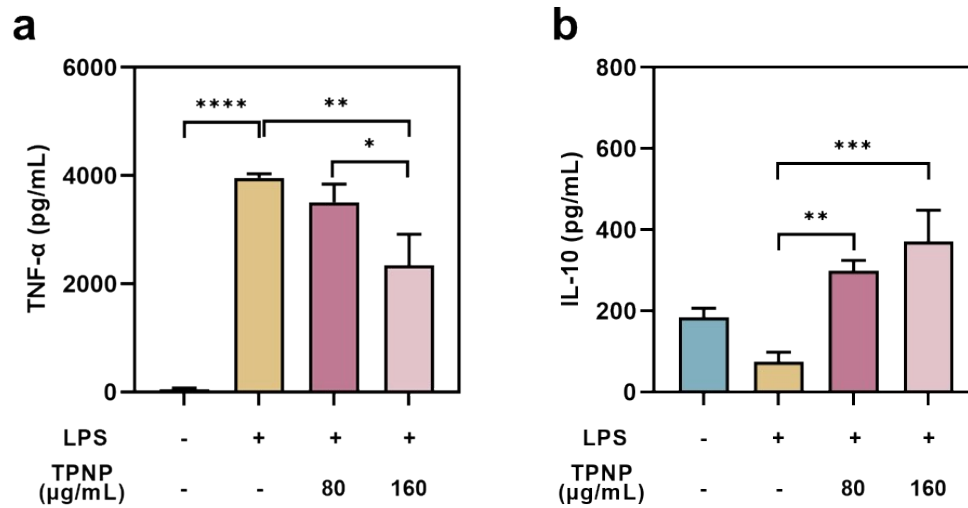

**Fig. S5** Detection of TNF- $\alpha$  (a, n = 4), and IL-10 (b, n = 3) secretion in the supernatant of RAW 264.7 cells with different interventions by ELISA. All of the data are presented as mean  $\pm$  s.d. \* $p < 0.05$ , \*\* $p < 0.01$ , \*\*\* $p < 0.001$ , and \*\*\*\* $p < 0.001$ .

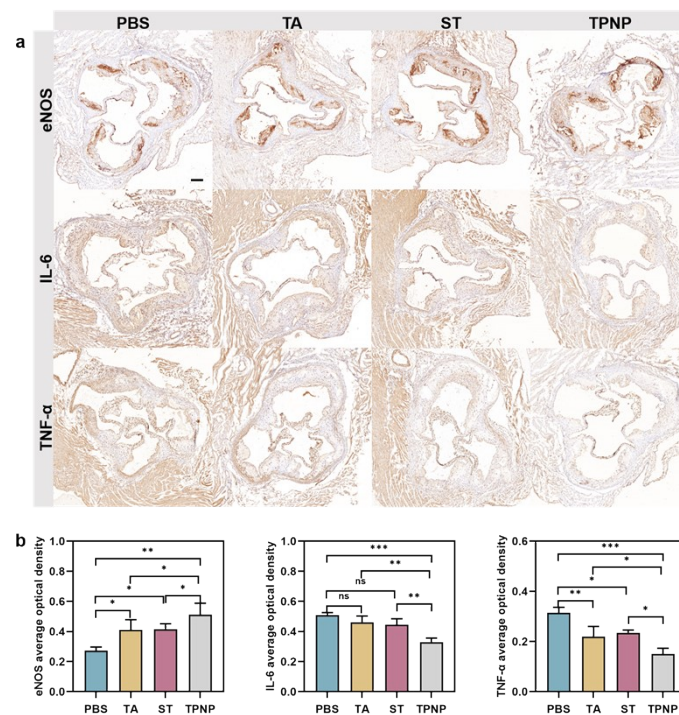

**Fig. S6** (a) Representative immunohistochemistry photographs of the aorta arch sections stained by eNOS, IL-6 and TNF- $\alpha$  antibody in ApoE<sup>-/-</sup> mice administered with PBS, Tannic acid, simvastatin and TPNP. Scale bar: 200  $\mu$ m. (b) Quantification of eNOS, IL-6 and TNF- $\alpha$

staining areas within the vessels (n = 3 biologically independent animals per group).

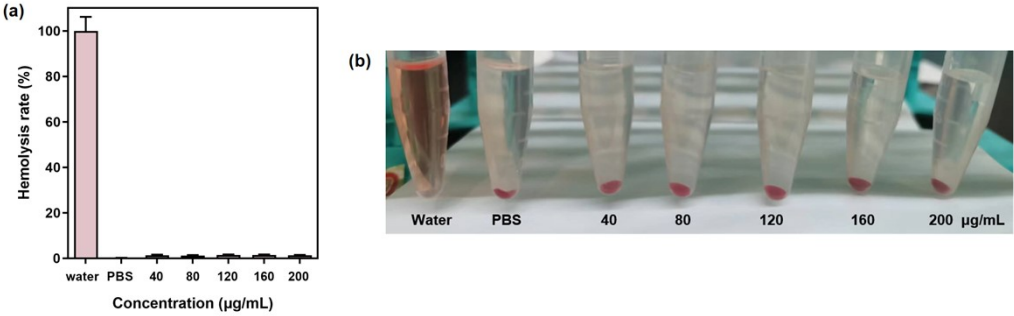

**Fig. S7** (a) Hemolysis percentage and corresponding pictures (b) of DI water, PBS and different concentration of TPNP.

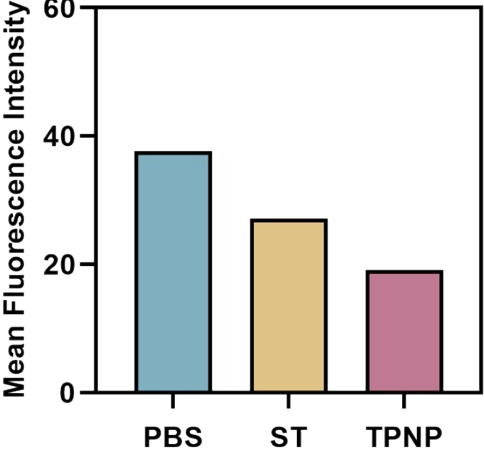

**Fig. S8** Quantitative analysis of DHE staining of the abdominal aorta sections in ApoE<sup>-/-</sup> mice administered with PBS, simvastatin and TPNP.

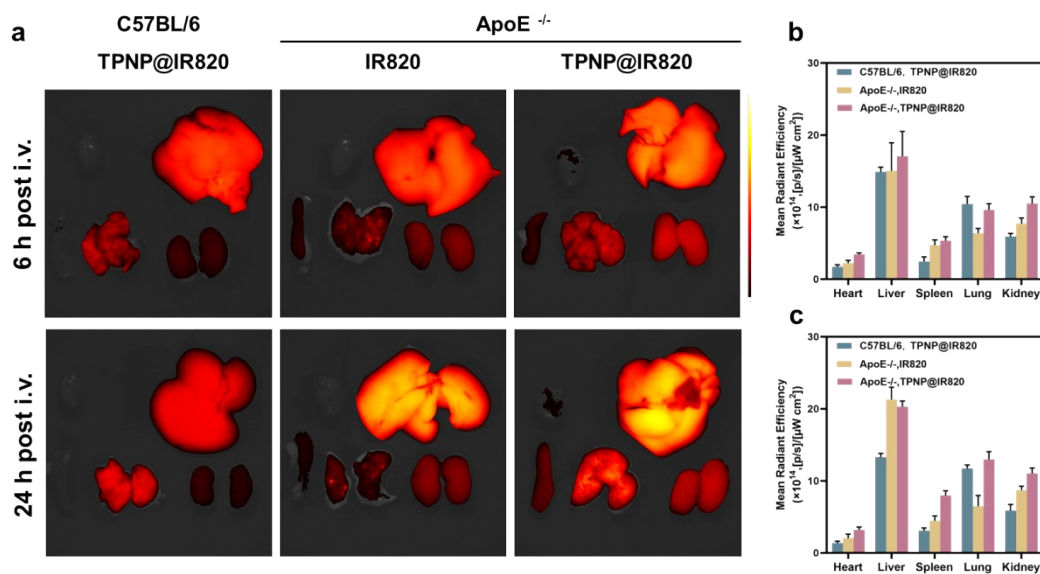

**Fig. S9** (a) Representative ex vivo fluorescent images of the heart, liver, spleen, lung and kidney harvested from C57BL/6 mice injected with TPNP@IR820 and ApoE<sup>-/-</sup> mice injected with IR820 or TPNP@IR820 at 6 h (above) and 24 h (below) post-injection, respectively. The minimal and maximal values of the color bar at right are 0.5 and  $4.0 \times 10^{14}$  [p/s/cm<sup>2</sup>/sr]/[ $\mu$ W/cm<sup>2</sup>], respectively. Quantitative analyses was performed for total radiant efficiency of isolated organs from each group at 6 h post-injection (b) and 24 h post-injection (c) (n = 4). All of the data are presented as mean  $\pm$  s.d.
